# Supplementary material for: Association of circulating branched-chain amino acids with cardiometabolic traits differs between adults and the oldest-old
Source: PubMed Central journal article supplement (PMC5687654; doi:10.18632/oncotarget.21489), 2017-10-04
Supplement: oncotarget-08-88882-s001.pdf [file oncotarget-08-88882-s001.pdf]

## Association of circulating branched-chain amino acids with cardiometabolic traits differs between adults and the oldest-old

### SUPPLEMENTARY MATERIALS

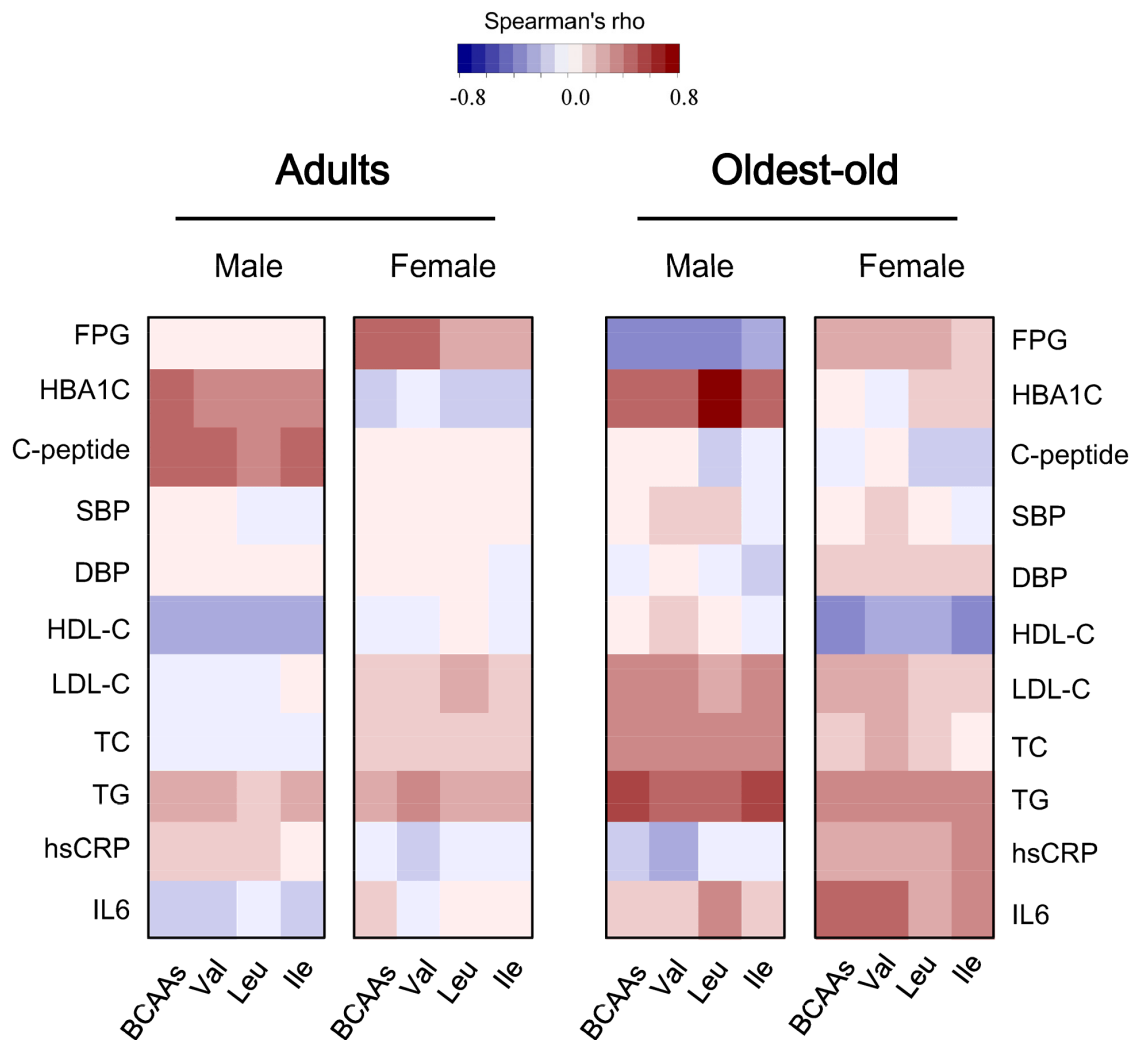

**Supplementary Figure 1: Correlation heatmap illustrating the relationship between circulating BCAAs and cardiometabolic quantitative phenotypes stratified by genders.** Spearman correlation coefficients are presented in a blue-white-red color scheme. Dark red indicates a more positive correlation, and dark blue indicates a more negative correlation; white indicates no correlation. We present the corresponding heatmaps for male and female subjects separately in adults and the oldest-old subjects,
